# Supplementary material for: A Matched Case-Control Study of Noncholesterol Sterols and Fatty Acids in Chronic Hemodialysis Patients
Source: MDPI journal article supplement (doi:10.3390/metabo11110774), 2021-11-12
Supplement: s1 [file s1]

# Supplementary Table S1

Correlations between fatty acid content and noncholesterol sterols in plasma phospholipids

| fatty acid      | lathosterol/TC<br>(mmol/mmol) | campesterol/TC<br>(mmol/mmol) | b-sitosterol/TC<br>(mmol/mmol) |
|-----------------|-------------------------------|-------------------------------|--------------------------------|
| 14:0*           | 0.2186+                       | 0.1527+                       | 0.1176                         |
| 16:0            | 0.2137+                       | -0.0025                       | -0.0491                        |
| 16:1n-9         | 0.1690+                       | 0.0103                        | 0.0081                         |
| 16:1n-7         | -0.0156                       | -0.0895                       | -0.0982                        |
| 18:0            | -0.1567+                      | -0.0736                       | -0.0321                        |
| 18:1n-9         | -0.0588                       | 0.0042                        | 0.0277                         |
| 18:1n-7         | 0.0025                        | 0.1887+                       | 0.1672+                        |
| 18:2n-6         | 0.0025                        | -0.0964                       | -0.0297                        |
| 18:3n-6         | -0.0956                       | -0.2622+                      | -0.2514+                       |
| 18:3n-3         | 0.1889+                       | 0.0758                        | 0.0176                         |
| 20:2n-6         | -0.1177                       | 0.0875                        | 0.1291                         |
| 20:3n-6         | -0.0798                       | -0.0643                       | -0.0444                        |
| 20:4n-6         | -0.1875                       | 0.0883                        | 0.0604                         |
| 20:5n-3         | 0.0462                        | 0.0466                        | -0.0279                        |
| 22:5n-6         | -0.1023                       | 0.1257                        | 0.1189                         |
| 22:5n-3         | 0.0367                        | 0.2206+                       | 0.1528+                        |
| 22:6n-3         | -0.0013                       | 0.1139                        | 0.0815                         |
| SSFA            | 0.1852+                       | -0.0704                       | -0.1072                        |
| SMUFA           | -0.0616                       | 0.0233                        | 0.0395                         |
| SPUFAn-6        | -0.1584+                      | 0.0022                        | 0.0536                         |
| SPUFAn-3        | 0.0209                        | 0.1397                        | 0.0856                         |
| D9D16           | -0.0902                       | -0.1005                       | -0.0840                        |
| D9D18           | 0.0646                        | 0.0524                        | 0.0426                         |
| 20:5n-3/20:4n-6 | 0.1395                        | -0.0115                       | -0.0721                        |
| 22:6n-3/20:4n-6 | 0.1116                        | 0.0225                        | -0.0024                        |

Data for fatty acids are given in molar percentages. Symbols and abbreviations: \* -shorthand notation for fatty acids: carbon number: double bond number, n – position of the carbon with the first double bond from methyl end; FA – fatty acid,  $\Sigma$  – the sum, SFA – saturated fatty acids, MFA – monounsaturated fatty acids, PUFAn-6 – polyunsaturated fatty acids of n-6 family, PUFAn-3 – polyunsaturated fatty acids of n-3 family, D9D16 – D9 desaturase for C16 (16:1n-7/16:0), D9D18 – D9 desaturase for C18 (18:1n-9/18:0); + -  $p < 0.05$

# Supplementary Table S2

Correlations between fatty acid content and noncholesterol sterols in plasma triacylglycerols

| fatty acid      | lathosterol/TC<br>(mmol/mmol) | campesterol/TC<br>(mmol/mmol) | b-sitosterol/TC<br>(mmol/mmol) |
|-----------------|-------------------------------|-------------------------------|--------------------------------|
| 14:0*           | 0.0900                        | 0.2396+                       | 0.1997+                        |
| 16:0            | 0.0581                        | -0.0944                       | -0.0952                        |
| 16:1n-9         | -0.1161                       | 0.1433                        | 0.1254                         |
| 16:1n-7         | -0.1593+                      | -0.0172                       | -0.0303                        |
| 18:0            | -0.0724                       | -0.0335                       | -0.0114                        |
| 18:1n-9         | -0.0385                       | -0.0610                       | -0.0826                        |
| 18:1n-7         | -0.0993                       | -0.0775                       | -0.0803                        |
| 18:2n-6         | -0.0266                       | 0.0480                        | 0.0892                         |
| 18:3n-6         | 0.0272                        | -0.0666                       | -0.0817                        |
| 18:3n-3         | 0.2552+                       | 0.1356                        | 0.0661                         |
| 20:2n-6         | -0.1693+                      | -0.1383                       | -0.0803                        |
| 20:3n-6         | -0.1316                       | 0.0611                        | 0.1040                         |
| 20:4n-6         | -0.1198                       | 0.1470+                       | 0.1657+                        |
| 20:5n-3         | 0.0239                        | 0.1200                        | 0.0887                         |
| 22:5n-6         | -0.1402                       | 0.2648+                       | 0.2327+                        |
| 22:5n-3         | 0.0724                        | 0.2578+                       | 0.2140+                        |
| 22:6n-3         | -0.0422                       | 0.1162                        | 0.1224                         |
| SSFA            | 0.0832                        | -0.0192                       | -0.0279                        |
| SMUFA           | -0.0731                       | -0.0545                       | -0.0780                        |
| SPUFAn-6        | -0.0668                       | 0.0661                        | 0.1112                         |
| SPUFAn-3        | 0.1529+                       | 0.2029+                       | 0.1455+                        |
| D9D16           | -0.2098+                      | 0.0019                        | -0.0055                        |
| D9D18           | 0.0487                        | 0.0190                        | -0.0222                        |
| 20:5n-3/20:4n-6 | 0.1854+                       | 0.0094                        | -0.0453                        |
| 22:6n-3/20:4n-6 | 0.0325                        | 0.0567                        | 0.0792                         |

Data for fatty acids are given in molar percentages. Symbols and abbreviations: \* -shorthand notation for fatty acids: carbon number: double bond number, n – position of the carbon with the first double bond from methyl end; FA – fatty acid,  $\Sigma$  – the sum, SFA – saturated fatty acids, MFA – monounsaturated fatty acids, PUFAn-6 – polyunsaturated fatty acids of n-6 family, PUFAn-3 – polyunsaturated fatty acids of n-3 family, D9D16 – D9 desaturase for C16 (16:1n-7/16:0), D9D18 – D9 desaturase for C18 (18:1n-9/18:0); + - p<0.05

# Supplementary Table S3

Correlations between fatty acid content and noncholesterol sterols in plasma cholesteryl esters

| fatty acid      | lathosterol/TC<br>(mmol/mmol) | campesterol/TC<br>(mmol/mmol) | b-sitosterol/TC<br>(mmol/mmol) |
|-----------------|-------------------------------|-------------------------------|--------------------------------|
| 14:0*           | 0.0864                        | 0.2158+                       | 0.1667+                        |
| 16:0            | 0.0976                        | 0.1639                        | 0.1250                         |
| 16:1n-9         | -0.0121                       | 0.1245                        | 0.0797                         |
| 16:1n-7         | -0.0456                       | 0.0391                        | 0.0366                         |
| 18:0            | -0.1245                       | -0.0081                       | 0.0685                         |
| 18:1n-9         | -0.1193                       | -0.0178                       | -0.0178                        |
| 18:1n-7         | -0.0445                       | 0.1602+                       | 0.1475+                        |
| 18:2n-6         | 0.0226                        | -0.1542+                      | -0.1289                        |
| 18:3n-6         | -0.0262                       | -0.0654                       | -0.0410                        |
| 18:3n-3         | 0.2198+                       | 0.1860+                       | 0.0962                         |
| 20:2n-6         | -0.0991                       | 0.1043                        | 0.1079                         |
| 20:3n-6         | -0.0545                       | -0.0663                       | -0.0274                        |
| 20:4n-6         | 0.0055                        | 0.1279                        | 0.1071                         |
| 20:5n-3         | 0.0399                        | 0.1403                        | 0.0900                         |
| 22:5n-6         | 0.0694                        | 0.1761+                       | 0.1367                         |
| 22:5n-3         | 0.0454                        | 0.1914+                       | 0.1437+                        |
| 22:6n-3         | 0.0356                        | 0.2196+                       | 0.2026+                        |
| SSFA            | 0.0827                        | 0.1798+                       | 0.1458+                        |
| SMUFA           | -0.0531                       | 0.0411                        | 0.0242                         |
| SPUFAn-6        | -0.0015                       | -0.1389                       | -0.1089                        |
| SPUFAn-3        | 0.1219                        | 0.2106+                       | 0.1420                         |
| D9D16           | -0.1255                       | -0.0420                       | -0.0198                        |
| D9D18           | 0.0717                        | -0.0172                       | -0.0963                        |
| 20:5n-3/20:4n-6 | 0.0463                        | 0.1058                        | 0.0464                         |
| 22:6n-3/20:4n-6 | 0.0101                        | 0.2137+                       | 0.2117+                        |

Data for fatty acids are given in molar percentages. Symbols and abbreviations: \* -shorthand notation for fatty acids: carbon number: double bond number, n – position of the carbon with the first double bond from methyl end; FA – fatty acid,  $\Sigma$  – the sum, SFA – saturated fatty acids, MFA – monounsaturated fatty acids, PUFAn-6 – polyunsaturated fatty acids of n-6 family, PUFAn-3 – polyunsaturated fatty acids of n-3 family, D9D16 – D9 desaturase for C16 (16:1n-7/16:0), D9D18 – D9 desaturase for C18 (18:1n-9/18:0); + -  $p < 0.05$

Supplementary Table S4 Selected parameters of liver function

| parameter                           | Group                   |                            | reference range           |
|-------------------------------------|-------------------------|----------------------------|---------------------------|
|                                     | CON (n = 26)            | HV-HFD (n = 26)            |                           |
| albumin (g/l)                       | 46.2 ± 2.1 <sup>1</sup> | 41.0 ± 5.1 <sup>a***</sup> | 35-53                     |
| aspartate aminotransferase (mcat/l) | 0.26 ± 0.07             | 0.40 ± 0.12 <sup>***</sup> | 0.10-0.72                 |
| alanine aminotransferase (mcat/l)   | 0.31 ± 0.13             | 0.45 ± 0.25                | 0.10-0.78                 |
| alkaline phosphatase (mcat/l)       | 2.06 ± 0.85             | 1.06 ± 0.31 <sup>***</sup> | 0.67/0.58 – 2.15/1.73 M/F |
| g-glutamyltransferase (mcat/l)      | 0.61 ± 0.44             | 0.54 ± 0.30                | 0.14-0.84 (obesity ↑)     |

<sup>1</sup> Data are given in average ± SD; <sup>a</sup>ANCOVA adjusted for age and BMI, \*\*\* - p < 0.001

Supplementary Table S5 Relationships between nutritional parameters and indices of inflammation

| <b>parameter</b>      | albumin (g/l)         | TC (mmol/l)          | HDL-C (mmol/l) | non HDL-C (mmol/l)   | BMI (kg/m <sup>2</sup> ) |
|-----------------------|-----------------------|----------------------|----------------|----------------------|--------------------------|
| SAA (mg/l)            | -0.560 <sup>1**</sup> | -0.370               | 0.049          | -0.459 <sup>*</sup>  | -0.117                   |
| hs-CRP (mg/l)         | -0.489 <sup>*</sup>   | -0.042               | 0.242          | -0.137               | -0.272                   |
| oxLDL (mU/l)          | 0.239                 | 0.722 <sup>***</sup> | 0.277          | 0.639 <sup>***</sup> | -0.043                   |
| SAA/apoA-I (mg/g)     | -0.539 <sup>**</sup>  | -0.359               | -0.037         | -0.429 <sup>*</sup>  | -0.094                   |
| HDL-C/apoA-I (mmol/g) | -0.477 <sup>*</sup>   | -0.289               | 0.363          | -0.218               | -0.228                   |

<sup>1</sup> Spearman rank-order correlation coefficients for dialysis group (n = 26); \* - p < 0.05, \*\* - p < 0.01, \*\*\* - p < 0.001
